# Supplementary material for: Association of Body Mass Index With Clinical Outcomes in Patients With Atrial Fibrillation: A Report From the FANTASIIA Registry
Source: PubMed Central journal article supplement — J Am Heart Assoc. 2019 Dec 24;9(1):e013789. doi: 10.1161/JAHA.119.013789 (PMC6988150; doi:10.1161/jaha.119.013789), 2019-12-24
Supplement: JAH3-9-e013789-s001.pdf [file JAH3-9-e013789-s001.pdf]

# **SUPPLEMENTAL MATERIAL**

## Appendix

### FANTASIA Registry Investigators

Carmen Rus Mansila<sup>1</sup>, Juan Luis Bonilla Palomas<sup>1</sup>, Antonio Luis Gámez López<sup>1</sup>, Daniel Salas Bravo<sup>1</sup>, Miriam Martín Toro<sup>1</sup>, Antonio Luis Gámez López<sup>1</sup>, Juan Luis Bonilla Palomas<sup>1</sup>, Manuel Anguita Sánchez<sup>2</sup>, Mónica Delgado Ortega<sup>2</sup>, Juan Carlos Castillo Domínguez<sup>2</sup>, Martín Ruiz Ortiz<sup>2</sup>, Elías Romo Peña<sup>2</sup>, Mónica Delgado Ortega<sup>2</sup>, Dr. Fátima Esteban<sup>3</sup>, Dr. Miguel Ángel Casanova<sup>3</sup>, Dr. Francisco Torres Calvo<sup>4</sup>, Dr. Rafael Bravo Marqués<sup>4</sup>, Dr. Pedro Chinchurreta Capote<sup>4</sup>, Dr. Alejandro Pérez Cabeza<sup>4</sup>, Dr. Raúl Quirós López<sup>4</sup>, Dr. Rodrigo Mayo Cabeza<sup>4</sup>, Dr. Juan José Gómez Doblaz<sup>5</sup>, Dr. José Carlos Pérez Sánchez<sup>5</sup>, Dr. Manuel Almendro Delia<sup>6</sup>, Dr. Cristina Jiménez Hidalgo<sup>6</sup>, Dr. Gonzalo Barón<sup>7</sup>, Dr. Silvia Gómez Moreno<sup>7</sup>, Dr. Antonio Fernández<sup>7</sup>, Dr. Lorena García Riesco<sup>7</sup>. Dr. María Laura García Pérez<sup>8</sup>, Dr. José Rozado Castaño<sup>8</sup>, Dr. Jorge Álvarez<sup>9</sup>, Dr. Tomas Ripoll Vera<sup>9</sup>, Dr. Joan Torres Marqués<sup>9</sup>, Dr. Juana Núñez Morcillo<sup>9</sup>, Dr. Marcos Rodríguez Esteban<sup>10</sup>, Dr. José Alejandro Medina García<sup>10</sup>, Dr. César Sosa<sup>10</sup>, Dr. Javier Mesa Fumero<sup>10</sup>, Dr. Daniel García Fuertes<sup>11</sup>, Dr. Manuel Crespín Crespín<sup>11</sup>, Dr. Inmaculada Coca Prieto<sup>11</sup>, Dr. José Gonzalo Delgado Díaz-Benito<sup>11</sup>, Dr. Elena Villanueva Fernández<sup>11</sup>, Dr. Teresa Cano Mozo<sup>12</sup>, Dr. José Luis Moriñigo Muñoz<sup>12</sup>, Dr. Ana Martín García<sup>12</sup>, Dr. Jesús Manuel Hernández Hernández<sup>12</sup>, Dr. Imanol Otaegui<sup>13</sup>, Dr. Jordi Pérez Rodón<sup>13</sup>, Dr. Jaume Francisco Pascual<sup>13</sup>, Dr. Neus Bellera Gotarda<sup>13</sup>, Dr. Eulalia Roig Minguell<sup>14</sup>, Dra. Sonia Mirabet Pérez<sup>14</sup>, Dr. Vicens Brossa<sup>14</sup>, Dr. Laura López<sup>14</sup>, Dr. Nicolás Manito Lorite<sup>15</sup>, Dr. Ignasi Anguera Camos<sup>15</sup>, Dr. David Chivite Guillén<sup>15</sup>, Dr. Jorge Antonio Morales Álvarez<sup>16</sup>, Dr. Andrés, Fernández Gasalia<sup>16</sup>, Dr. Neus Piulats Egea<sup>16</sup>, Dr. Josep Casas Rodríguez<sup>16</sup>, Dr. Óscar Alcaide<sup>17</sup>, Dr. Roger Villuendas<sup>17</sup>, Dr. Áxel Sarrias<sup>17</sup>, Dr. Mar Domingo<sup>17</sup>, Dr. Ramón de Castro<sup>18</sup>, Dr. Nuria

Farré<sup>18</sup>, Dr. Isabel Serrano Rodríguez<sup>18</sup>, Dr. Ingrid Colomer<sup>18</sup>, Dr. José Moreno Arribas<sup>19</sup>, Dr. Vicente Bertomeu González<sup>19</sup>, Dr. Bertomeu Martínez<sup>19</sup>, Dr. Francisco Ridocci Soriano<sup>20</sup>, Dr. Rafael Payá Serrano<sup>20</sup>, Dr. Jose Antonio Madrigal Vilata<sup>20</sup>, Dr. José Perez Silvestre<sup>20</sup>, Dr. Juan Cosín Sales<sup>21</sup>, Dr. Francisco Buendía<sup>21</sup>, Dr. Esther Esteban<sup>21</sup>, Dr. Antonio Lillo<sup>21</sup>, Dr. Dolores Marco Macian<sup>21</sup>, Dr. Yolanda Porrás Ramos<sup>22</sup>, Dr. M<sup>a</sup> Victoria Mongollón Jiménez<sup>22</sup>, Dr. Pilar Marón Ramos<sup>23</sup>, Dr. Alfonso Varela Román<sup>23</sup>, Dr. Antonio Pose Reino<sup>23</sup>, Dr. Manuel Suárez Tembra<sup>23</sup>, Dr. Manuel Lado López<sup>23</sup>, Dr. Carlos González Juanatey<sup>24</sup>, Dr. Inmaculada Roldán<sup>25</sup>, Dr. Carlos Escobar Cervantes<sup>25</sup>, Dr. Marta Mateos García<sup>25</sup>, Dr. M<sup>a</sup> Angustias Quesada Simón<sup>25</sup>, Dr. José Camacho Siles<sup>25</sup>, Dr. Paloma Eviro García<sup>25</sup>, Dr. Manuel Martínez Sellés<sup>26</sup>, Dr. Tomás Datino<sup>26</sup>, Dr. M<sup>a</sup> Teresa Vidán<sup>26</sup>, Dr. Luis Cornide<sup>26</sup>, Dr. Pablo García Pavía<sup>27</sup>, Dr. Marta M<sup>a</sup> Cobo Marcos<sup>27</sup>, Dr. David Vivas<sup>28</sup>, Dr. Javier Higuera Nafría<sup>28</sup>, Dr. José Manuel Rubio Campal<sup>29</sup>, Dr. Pepa Sánchez Borque<sup>29</sup>, Dr. Francisco Marín Ortuño<sup>30</sup>, Dr. Miguel García Navarro<sup>30</sup>, Dr. Raquel Pérez Luján<sup>30</sup>, Dr. Mariano Leal Hernández<sup>30</sup>, Dr. Sergio Manzano Fernández<sup>30</sup>, Dr. Diego Giménez Cervantes<sup>31</sup>, Dr. Francisco José García Amargo<sup>31</sup>, Dr. Manuel González Ortega<sup>31</sup>, Dr. Milagros Gil Ortega<sup>31</sup>, Dr. Nekane Murga Eizagahevarría<sup>32</sup>, Dr. Esther Recalde<sup>32</sup>.

**Centers:** <sup>1</sup>Ciudad de Jaén Hospital, Jaén, Spain. <sup>2</sup>Reina Sofía Hospital, Córdoba, Spain. <sup>3</sup>Infanta Margarita Hospital, Cabra, Córdoba, Spain. <sup>4</sup>Costa del Sol Hospital, Marbella, Spain. <sup>5</sup>Virgen de la Victoria Hospital, Málaga, Spain. <sup>6</sup>Virgen Macarena Hospital, Sevilla, Spain. <sup>7</sup>Virgen del Rocío Hospital, Sevilla, Spain. <sup>8</sup>Central de Asturias Hospital, Asturias, Spain. <sup>9</sup>Son Llázer Hospital, Baleares, Spain. <sup>10</sup>Candelaria Hospital, Canarias, Spain. <sup>11</sup>Santa Bárbara Hospital, Ciudad Real, Spain. <sup>12</sup>Clínico de Salamanca Hospital,

Salamanca, Spain. <sup>13</sup>Vall d'Hebrón Hospital, Barcelona, Spain. <sup>14</sup>Sant Pau Hospital, Barcelona, Spain. <sup>15</sup>Universitari de Bellvitge Hospital, Barcelona, Spain. <sup>16</sup>Del Mar Hospital, Barcelona, Spain. <sup>17</sup>Germans Trias, Barcelona, Spain. <sup>18</sup>Juan XXIII, Tarragona, Spain. <sup>19</sup>San Juan de Alicante Hospital, San Juan, Spain. <sup>20</sup>General Hospital, Valencia, Spain. <sup>21</sup>Arnau de Vilanova Hospital, Valencia, Spain. <sup>22</sup> Cáceres Hospital, Cáceres, Spain. <sup>23</sup>Clínico de Santiago de Compostela, Galicia, Spain. <sup>24</sup>Universitario Lucus Augusti Hospital, Galicia, Spain. <sup>25</sup>La Paz Hospital, Madrid, Spain. <sup>26</sup>Gregorio Marañón Hospital, Madrid, Spain. <sup>27</sup>Puerta de Hierro Hospital, Madrid, Spain. <sup>28</sup>Clínico San Carlos, Madrid, Spain. <sup>29</sup>Fundación Jiménez Díaz Hospital, Madrid, Spain. <sup>30</sup>Virgen de la Arrixaca Hospital, Murcia, Spain. <sup>31</sup>Morales Meseguer Hospital, Murcia, Spain. <sup>32</sup>Basurto Hospital, Vizcaya, Spain

**Table S1. Quality of antivitamin k control stratified by BMI.**

|                              | <b>Normal weight<br/>(BMI &lt; 25<br/>kg/m<sup>2</sup>)</b> | <b>Overweight<br/>(BMI 25-30<br/>kg/m<sup>2</sup>)</b> | <b>Obese (BMI<br/>≥ 30 kg/m<sup>2</sup>)</b> | <b>p value</b> |
|------------------------------|-------------------------------------------------------------|--------------------------------------------------------|----------------------------------------------|----------------|
| N                            | 266                                                         | 643                                                    | 574                                          |                |
| TTR Rosendaal (mean ± SD), % | 61.1 ± 19.4                                                 | 62.5 ± 20.7                                            | 63.1 ± 19.2                                  | 0.42           |
| TTR < 65% (%)                | 55.7                                                        | 52.4                                                   | 51.1                                         | 0.52           |
| TTR < 70% (%)                | 64.1                                                        | 62                                                     | 62.2                                         | 0.87           |

BMI: body mass index; SD: standard deviation; TTR: time in the therapeutic range.

**Table S2. Univariate Cox regression.**

| <b>Total mortality</b>                 | <b>HR</b> | <b>95% CI</b> |      | <b>p value</b> |
|----------------------------------------|-----------|---------------|------|----------------|
| BMI (reference <30 kg/m <sup>2</sup> ) | 0.81      | 0.62          | 1.05 | 0.10           |
| Female sex                             | 0.79      | 0.61          | 1.02 | 0.12           |
| Age, per year                          | 1.09      | 1.07          | 1.11 | <0.01          |
| Arterial hypertension                  | 1.80      | 1.25          | 2.60 | <0.01          |
| Diabetes mellitus                      | 1.60      | 1.24          | 2.07 | <0.01          |
| Dyslipidemia                           | 1.02      | 0.79          | 1.30 | 0.90           |
| Coronary artery disease                | 1.80      | 1.37          | 2.37 | <0.01          |
| Heart failure                          | 2.37      | 1.85          | 3.03 | <0.01          |
| Aortic valve disease                   | 1.49      | 0.96          | 2.31 | 0.07           |
| Chronic kidney failure                 | 2.77      | 2.13          | 3.61 | <0.01          |
| Charlson index                         | 1.48      | 1.36          | 1.62 | <0.01          |
| Cerebrovascular disease                | 1.25      | 0.92          | 1.70 | 0.16           |
| CHA2DS2-VASc                           | 1.39      | 1.29          | 1.50 | <0.01          |
| HAS-BLED                               | 1.69      | 1.52          | 1.50 | <0.01          |
| <b>Stroke</b>                          | <b>HR</b> | <b>95% CI</b> |      | <b>p value</b> |
| BMI (reference <30 kg/m <sup>2</sup> ) | 0.99      | 0.54          | 1.80 | 0.97           |
| Female sex                             | 0.76      | 0.42          | 1.39 | 0.37           |
| Age, per year                          | 1.02      | 0.56          | 1.89 | 0.27           |
| Arterial hypertension                  | 1.42      | 0.63          | 3.18 | 0.40           |
| Diabetes mellitus                      | 1.03      | 0.54          | 1.97 | 0.93           |
| Dyslipidemia                           | 1.21      | 0.67          | 2.18 | 0.53           |

|                                        |           |               |      |                |
|----------------------------------------|-----------|---------------|------|----------------|
| Coronary artery disease                | 1.97      | 1.03          | 3.75 | 0.04           |
| Heart failure                          | 2.21      | 1.22          | 3.99 | <0.01          |
| Aortic valve disease                   | 0.76      | 0.18          | 3.12 | 0.69           |
| Chronic kidney failure                 | 2.26      | 1.23          | 4.17 | <0.01          |
| Charlson index                         | 1.36      | 1.09          | 1.70 | <0.01          |
| Cerebrovascular disease                | 2.57      | 1.38          | 4.79 | <0.01          |
| CHA2DS2-VASc                           | 1.33      | 1.11          | 1.60 | <0.01          |
| HAS-BLED                               | 1.52      | 1.17          | 1.96 | <0.01          |
| <b>Major bleeding</b>                  | <b>HR</b> | <b>95% CI</b> |      | <b>p value</b> |
| BMI (reference <30 kg/m <sup>2</sup> ) | 0.80      | 0.57          | 1.14 | 0.22           |
| Female sex                             | 0.96      | 0.69          | 1.33 | 0.81           |
| Age, per year                          | 1.03      | 1.01          | 1.05 | <0.01          |
| Arterial hypertension                  | 1.11      | 0.73          | 1.68 | 0.62           |
| Diabetes mellitus                      | 1.52      | 1.08          | 2.13 | 0.02           |
| Dyslipidemia                           | 0.67      | 0.48          | 0.93 | 0.02           |
| Coronary artery disease                | 1.33      | 0.90          | 1.97 | 0.15           |
| Heart failure                          | 1.57      | 1.12          | 2.20 | <0.01          |
| Aortic valve disease                   | 1.14      | 0.60          | 2.17 | 0.69           |
| Chronic kidney failure                 | 1.98      | 1.42          | 2.78 | <0.01          |
| Charlson index                         | 1.32      | 1.17          | 1.49 | <0.01          |
| Cerebrovascular disease                | 1.47      | 1.00          | 2.17 | 0.05           |
| CHA2DS2-VASc                           | 1.24      | 1.12          | 1.38 | <0.01          |
| HAS-BLED                               | 1.47      | 1.27          | 1.70 | <0.01          |

| <b>MACE</b>                            | <b>HR</b> | <b>95% CI</b> |      | <b>p value</b> |
|----------------------------------------|-----------|---------------|------|----------------|
| BMI (reference <30 kg/m <sup>2</sup> ) | 0.91      | 0.66          | 1.24 | 0.54           |
| Female sex                             | 0.90      | 0.66          | 1.22 | 0.49           |
| Age, per year                          | 1.06      | 1.04          | 1.08 | <0.01          |
| Arterial hypertension                  | 1.52      | 0.99          | 2.33 | 0.06           |
| Diabetes mellitus                      | 2.06      | 1.51          | 2.80 | <0.01          |
| Dyslipidemia                           | 1.49      | 1.09          | 2.04 | 0.01           |
| Coronary artery disease                | 2.80      | 2.05          | 3.84 | <0.01          |
| Heart failure                          | 2.73      | 2.01          | 3.69 | <0.01          |
| Aortic valve disease                   | 2.20      | 1.38          | 3.52 | <0.01          |
| Chronic kidney failure                 | 2.46      | 1.79          | 3.38 | <0.01          |
| Charlson index                         | 1.52      | 1.36          | 1.69 | <0.01          |
| Cerebrovascular disease                | 1.39      | 0.96          | 2.01 | 0.08           |
| CHA2DS2-VASc                           | 1.45      | 1.32          | 1.59 | <0.01          |
| HAS-BLED                               | 1.60      | 1.40          | 1.82 | <0.01          |

BMI: body mass index; CI: confidence interval; HR: hazard ratio.



**Table S3. Event rates for subgroups, stratified by BMI.**

|                            | Normal weight                   |                                 | Overweight                      |                                 | Obese                           |  | p<br>value |
|----------------------------|---------------------------------|---------------------------------|---------------------------------|---------------------------------|---------------------------------|--|------------|
|                            | (BMI < 25 kg/m <sup>2</sup> )   |                                 | (BMI 25-30 kg/m <sup>2</sup> )  |                                 | (BMI ≥ 30 kg/m <sup>2</sup> )   |  |            |
|                            | N = 358                         |                                 | N = 871                         |                                 | N = 727                         |  |            |
|                            | Annual<br>rate<br>n<br>(%/year) | Annual<br>rate<br>n<br>(%/year) | Annual<br>rate<br>n<br>(%/year) | Annual<br>rate<br>n<br>(%/year) | Annual<br>rate<br>n<br>(%/year) |  |            |
| <b>All-cause mortality</b> |                                 |                                 |                                 |                                 |                                 |  |            |
| <i>Age</i>                 |                                 |                                 |                                 |                                 |                                 |  |            |
| < 65<br>years              | 4<br>(2.83)                     | 5<br>(1.32)                     | 4<br>(0.91)                     | 0.23                            |                                 |  |            |
| 65-75<br>years             | 9<br>(2.75)                     | 31<br>(3.47)                    | 25<br>(8.33)                    | 0.80                            |                                 |  |            |
| > 75<br>years              | 39<br>(6.44)                    | 83<br>(6.19)                    | 55<br>(6.03)                    | 0.93                            |                                 |  |            |
| <i>Sex</i>                 |                                 |                                 |                                 |                                 |                                 |  |            |
| Women                      | 19<br>(3.79)                    | 44<br>(2.54)                    | 35<br>(3.44)                    | 0.68                            |                                 |  |            |
| Men                        | 33<br>(5.76)                    | 75<br>(4.84)                    | 49<br>(4.21)                    | 0.32                            |                                 |  |            |
| <b>MACE</b>                |                                 |                                 |                                 |                                 |                                 |  |            |
| <i>Age</i>                 |                                 |                                 |                                 |                                 |                                 |  |            |
| < 65<br>years              | 4<br>(2.83)                     | 6<br>(1.59)                     | 6<br>(1.37)                     | 0.53                            |                                 |  |            |

|                |    |        |    |        |    |        |      |
|----------------|----|--------|----|--------|----|--------|------|
| 65-75<br>years | 5  | (1.53) | 21 | (2.35) | 23 | (2.77) | 0.47 |
| > 75<br>years  | 15 | (2.48) | 57 | (4.25) | 31 | (3.40) | 0.12 |
| <i>Sex</i>     |    |        |    |        |    |        |      |
| Women          | 12 | (2.39) | 27 | (2.54) | 31 | (3.05) | 0.70 |
| Men            | 12 | (2.09) | 57 | (3.67) | 29 | (2.49) | 0.07 |

---

BMI: body mass index; MACE: major adverse cardiovascular events (composite of ischemic stroke, myocardial infarction and cardiovascular and total mortality).
